# Supplementary material for: The Evolutionary Origin of Peroxisomes: An ER-Peroxisome Connection
Source: Oxford University Press journal article supplement (doi:10.1093/molbev/msj103), 2006-02-01
Supplement: msj103_Supplementary_Data.zip [file msj103_Supplementary_Data.zip]

Archive with 1 entries (1 files):
- msj103supp.pdf
