# Supplementary material for: The Evolutionary Origin of Peroxisomes: An ER-Peroxisome Connection
Source: Oxford University Press journal article supplement (doi:10.1093/molbev/msj103), 2006-02-01
Supplement: msj103_Supplementary_Data.zip [file msj103_Supplementary_Data.zip › msj103supp.pdf]

## Supplementary Figure 1

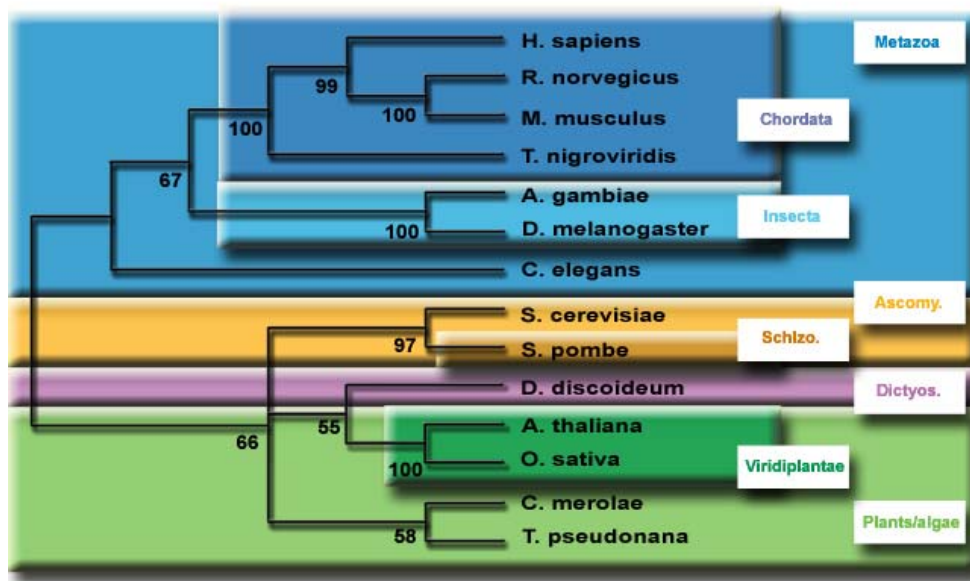

**Supplementary Figure 1.** Peroxisomal phylogenetic Supertree. The set of 25 proteins used to generate is depicted in Figure 1. Numbers correspond to bootstrap values over 50%, reached after 500 replications. The tree is divided into two main branches: (1) metazoan and (2) Fungi, Protozoa and Plants/algae. Ascomy: Ascomycota, Dictyos: Dictyostellida and Schizo: Schizosaccharomycetes.

Supplementary Table I

| Protein | Domain     | Function                | Compartment                                             | % region of similarity in Bacteria/Archaea |
|---------|------------|-------------------------|---------------------------------------------------------|--------------------------------------------|
| Pex1    | AAA        | Protein import          | Cytosol and docking sites with the peroxisomal membrane | 29%                                        |
| Pex6    | AAA        | Protein import          | Cytosol and docking sites with the peroxisomal membrane | 32%                                        |
| Pex5    | TPR        | Target signal receptor  | Cytosol and docking sites with the peroxisomal membrane | 18%                                        |
| Pex5R   | TPR        | Target signal receptor? | Cytosol and docking sites with the peroxisomal membrane | 18%                                        |
| Pex7    | WD repeats | Target signal receptor  | Cytosol and docking sites with the peroxisomal membrane | 43%                                        |
| Pex14   | PXXP       | Docking of receptors    | Peroxisomal membrane                                    | 16%                                        |

**Supplementary Table I:** List of the 6 peroxins showing restricted motifs of homology in Bacteria/Archea genomes. Only 6 Pex out of the established 35 peroxins exhibit bacterial homology after 5 iterations by PSI-BLAST analysis (E value cutoff of  $10^{-3}$ ). Among them, the 2 receptors that recognize both PTSs (Peroxisomal Target Signals), and the 2 Pexs that harbour the AAA domain (ATPases associated with various cellular activities). The % region of similarity corresponds to the length of the region of homology between the closest Bacterial/Archeal homolog of the given peroxisomal protein and the latter, calculated in % to the total length of the given protein.
